# Supplementary material
Source: PubMed Central journal article supplement (PMC3716325)
Supplement: supp_mol.113.086322_Supplementary_Figure_1.pdf [file supp_mol.113.086322_Supplementary_Figure_1.pdf]

**Title:** Arginine Vasopressin Enhances Cell Survival Via a GRK2- $\beta$ arrestin1-ERK1/2-Dependent Pathway in H9c2 Cells

**Authors:** Weizhong Zhu, Douglas G. Tilley, Valerie D. Myers, Ryan C. Coleman and Arthur M. Feldman

**Journal:** Molecular Pharmacology

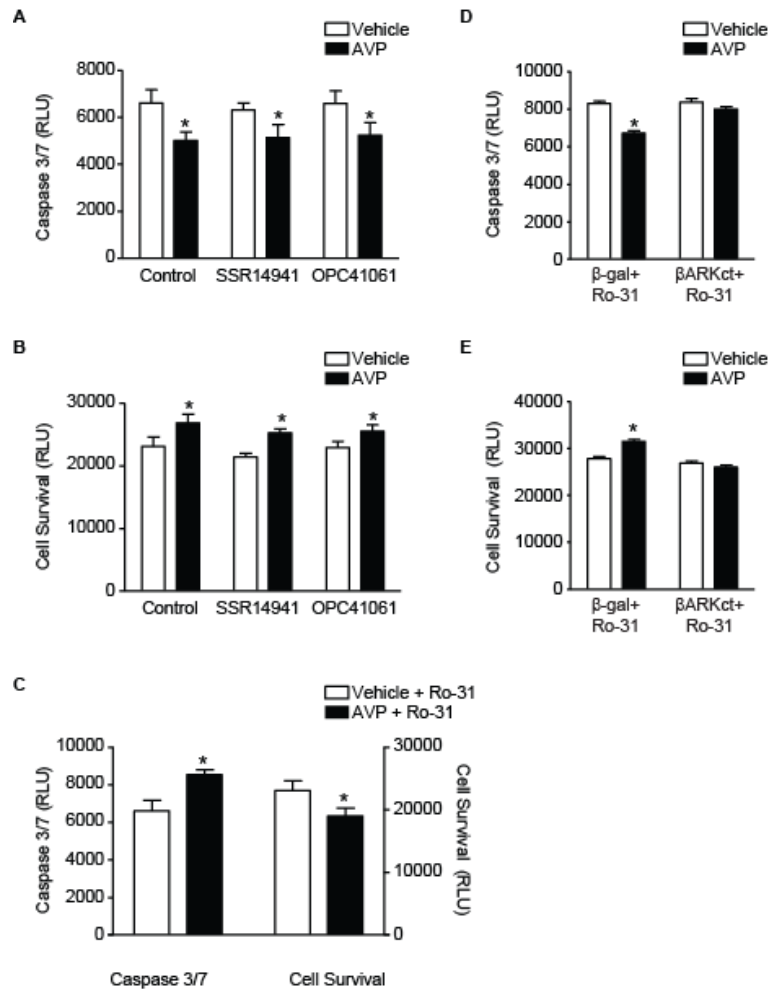

**Supplementary Figure 1.  $V_{1B}R$ ,  $V_{2R}$  and PKC antagonists do not prevent AVP-mediated effects on caspase 3/7 activity and cell survival.** H9c2 cells underwent caspase 3/7 activity and cell survival analysis following H/R in the presence or absence of (A)  $V_{1B}R$ - (SSR14941, 0.1 $\mu$ M), (B)  $V_{2R}$ - (OPC41061, 0.1 $\mu$ M) or (C) PKC- (Ro-31, 1 $\mu$ M) selective antagonists and AVP (10nM). \* $P < 0.05$  vs vehicle (PBS)-stimulated control, one-way ANOVA. (D, E) Pretreatment of H9c2 cells with Ro-31 (1  $\mu$ M) prior to H/R did not impact the effect of  $\beta$ ARKct overexpression on AVP-protection in decreasing caspase 3/7 activity and in increasing in cell survival, \* $P < 0.05$  vs vehicle (PBS)-stimulated  $\beta$ -gal+Ro-31 condition, one-way ANOVA. The data are presented as mean  $\pm$  SEM of 3 independent experiments.
