# Supplementary material
Source: PubMed Central journal article supplement (PMC3716325)
Supplement: supp_mol.113.086322_Supplementary_Figure_3.pdf [file supp_mol.113.086322_Supplementary_Figure_3.pdf]

**Title:** Arginine Vasopressin Enhances Cell Survival Via a GRK2- $\beta$ arrestin1-ERK1/2-Dependent Pathway in H9c2 Cells

**Authors:** Weizhong Zhu, Douglas G. Tilley, Valerie D. Myers, Ryan C. Coleman and Arthur M. Feldman

**Journal:** Molecular Pharmacology

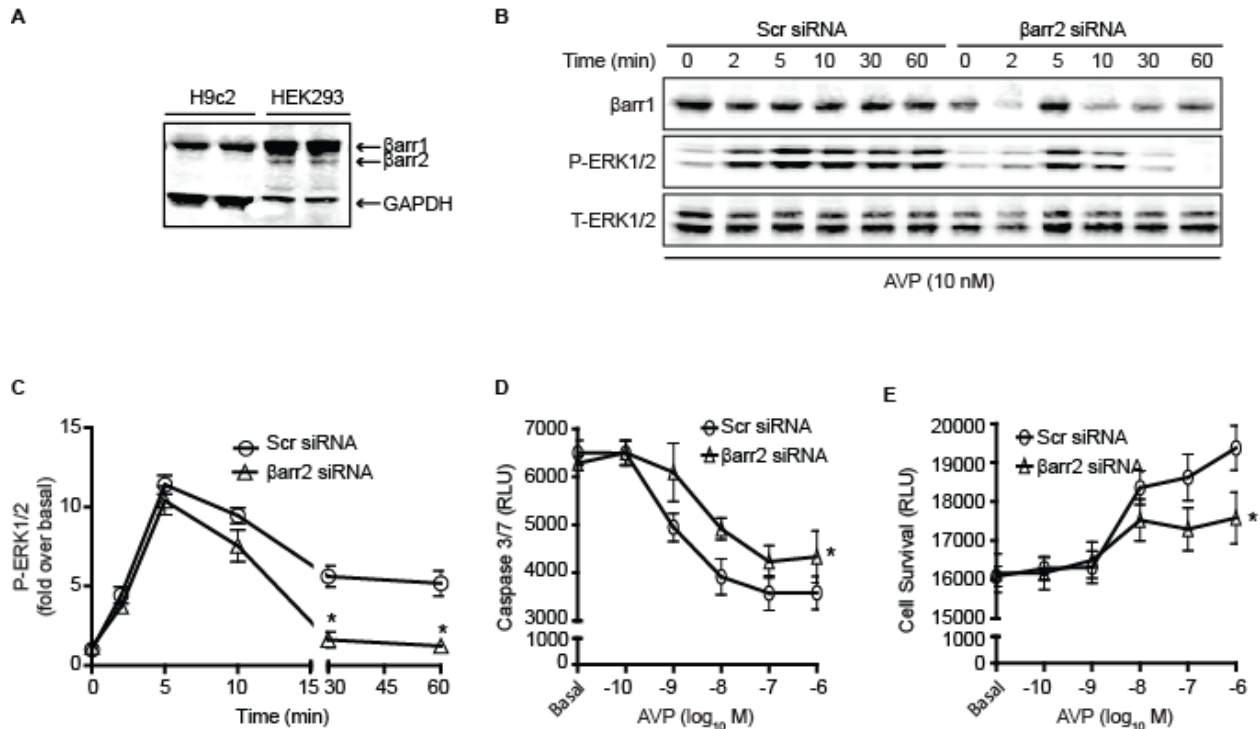

**Supplementary Figure 3.  $\beta$ arr1 is the predominant isoform in H9c2 cells.** (A) Both H9c2 and HEK293 cell lysates (15  $\mu$ g protein/lane) were employed to determine the relative protein expression of  $\beta$ -arrestins 1 and 2, with GAPDH as an internal control. H9c2 cells were transfected with siRNA directed against  $\beta$ arr2, which variably reduced expression of  $\beta$ arr1 (B) and altered the P-ERK1/2 (C), caspase 3/7 (D) and cell viability (E) responses to AVP stimulation. \* $P < 0.05$  vs scrambled siRNA control via one-way ANOVA (C) or repeated two-way ANOVA (D, E). All data are presented as mean  $\pm$  SEM of 3 independent experiments.
